# Supplementary material
Source: PubMed Central journal article supplement (PMC6589115)

**Supplemental Table X. Reasons for labor and non-labor related mobility (among those reporting any mobility), by sex and region**

| Reported reason                                        | Women        |             |              | Region<br>p value | Men         |             |              | Region<br>p value |
|--------------------------------------------------------|--------------|-------------|--------------|-------------------|-------------|-------------|--------------|-------------------|
|                                                        | Kenya        | Uganda<br>E | Uganda<br>SW |                   | Kenya       | Uganda<br>E | Uganda<br>SW |                   |
| <b>Weighted n</b>                                      | 677.5        | 300         | 331.7        |                   | 509.5       | 244         | 245.3        |                   |
| <i>Most common reason for non-work travel (%)</i>      |              |             |              | 0.001             |             |             |              | <0.001            |
| Care-giving / Care-seeking                             | 40.6 (8.3)   | 0.6 (4.1)   | 25.9 (13.0)  |                   | 9.6 (4.5)   | 13.2 (57.0) | 15.2 (20.3)  |                   |
| Funeral                                                | 256.0 (52.2) | 7.6 (49.8)  | 45.3 (22.6)  |                   | 85.5 (40.6) | 0.8 (3.5)   | 9.0 (12.1)   |                   |
| Holiday / Visiting family                              | 115.6 (23.6) | 0.6 (3.7)   | 103.0 (51.5) |                   | 71.8 (34.1) | 4.0 (17.2)  | 44.3 (59.5)  |                   |
| Other                                                  | 74.2 (15.1)  | 3.6 (23.2)  | 21.9 (10.9)  |                   | 34.3 (16.3) | 3.2 (13.7)  | 0.5 (0.6)    |                   |
| Schooling                                              | 4.0 (0.8)    | 3.0 (19.2)  | 4.0 (2.0)    |                   | 9.5 (4.5)   | 2.0 (8.5)   | 5.6 (7.5)    |                   |
| <i>Most common reason for labor-related travel (%)</i> |              |             |              | 0.005             |             |             |              | 0.003             |
| Artisanal labor (e.g. construction)                    | 0            | 0           | 0            |                   | 21.4 (34.5) | 1.0 (17.5)  | 6.5 (18.3)   |                   |
| Farming (own or others' plots)                         | 1.0 (5.1)    | 0.0 (0.0)   | 1.4 (15.0)   |                   | 2.2 (3.5)   | 0.2 (4.3)   | 6.4 (17.8)   |                   |
| Fishing                                                | 2.3 (11.1)   | 0.0 (0.0)   | 0.0 (0.0)    |                   | 17.2 (27.9) | 0.1 (1.9)   | 1.0 (2.7)    |                   |
| Looking for work                                       | 0.1 (0.3)    | 0.2 (100.0) | 6.8 (74.4)   |                   | 2.7 (4.4)   | 3.0 (52.5)  | 0.0 (0.0)    |                   |
| Market trading (including buying stock to sell)        | 17.1 (83.5)  | 0.0 (0.0)   | 1.0 (10.6)   |                   | 18.3 (29.6) | 1.4 (23.8)  | 21.9 (61.3)  |                   |

Notes: Data refer to reasons for travel in prior six months that required sleeping away from primary residence(s). All metrics adjusted for sampling design.

**Supplemental Figure X. Temporicity (frequency by duration of overnight trips in past 6 months), by region and sex**

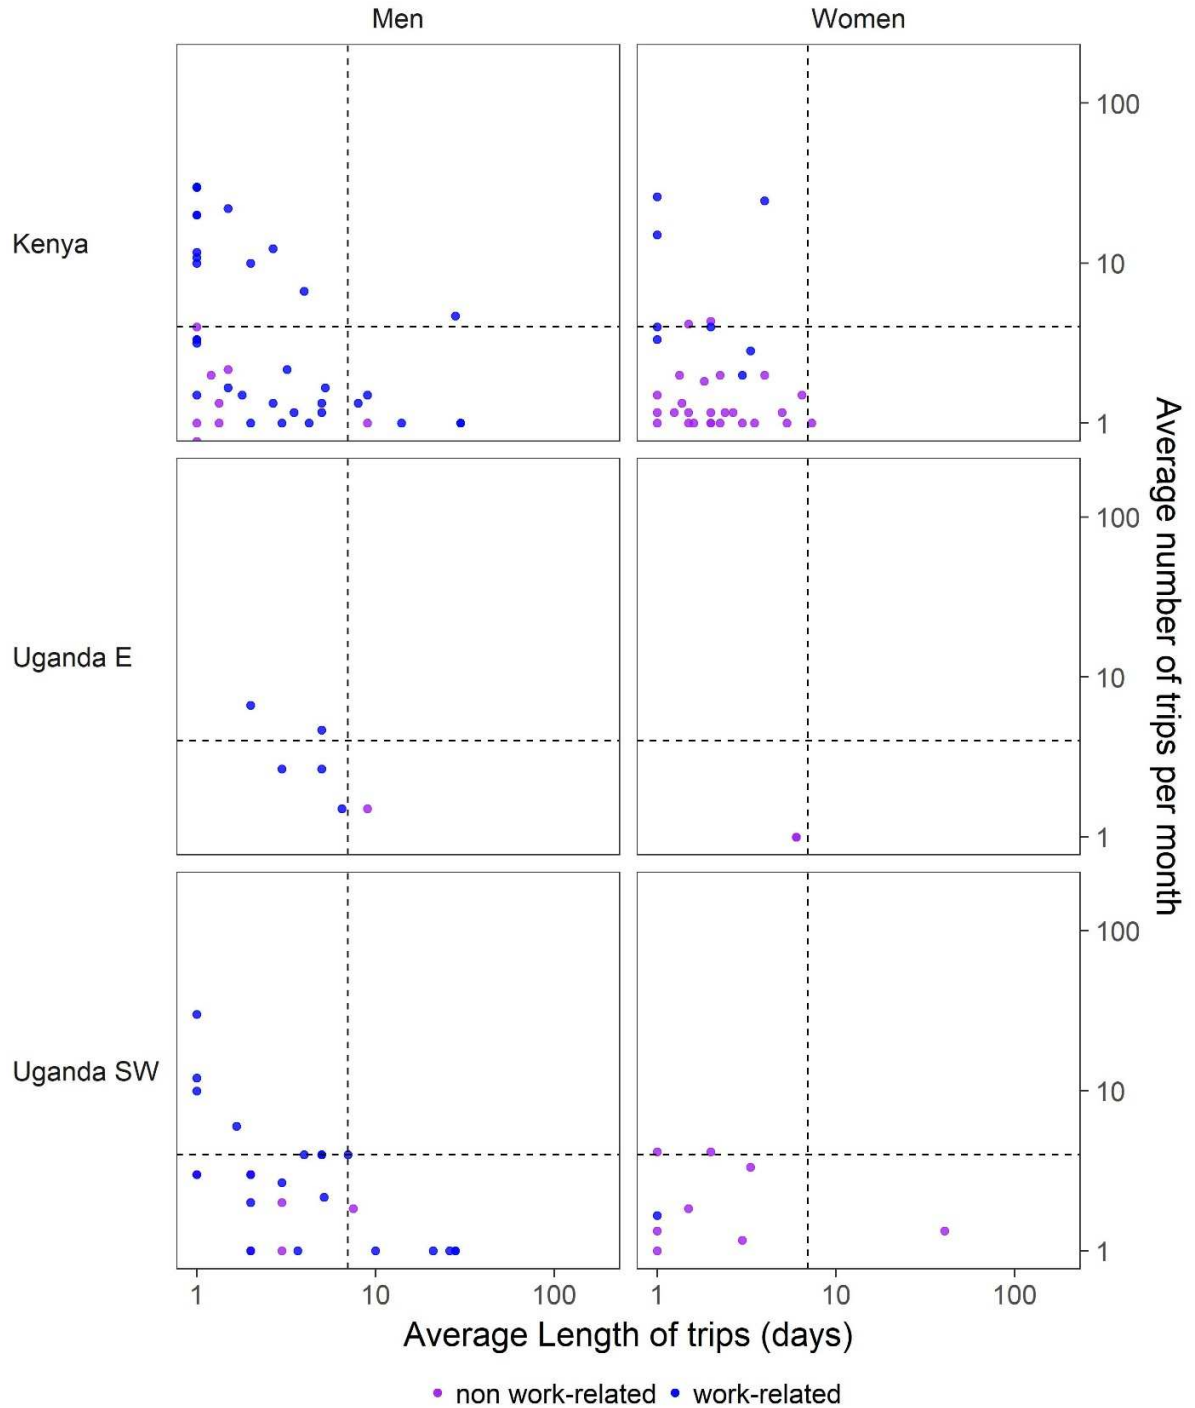

Supplement: NIHMS1529479-supplement-1.pdf [file NIHMS1529479-supplement-1.pdf]
